# Supplementary material
Source: HighWire-hosted journal article supplement (https://thorax.bmj.com/content/75/11/974)
Supplement: inline-supplementary-material-1 [file inline-supplementary-material-1.pdf]

**Online Data Supplement:**

Severe respiratory viral infection induces procalcitonin in the absence of bacterial pneumonia

Samir Gautam, Avi J Cohen, Yannick Stahl, Patricia Valda Toro, Grant M Young, Rupak Datta, Xiting Yan, Nicholas T Ristic, Santos D Bermejo, Lokesh Sharma, Marcos I Restrepo, Charles S Dela Cruz

**Supplemental methods:**

Matching strategy

We used a matching strategy to test the hypothesis that elevated procalcitonin (PCT) in the co-infection group was attributable to severity rather than bacterial infection. In this approach, we assembled a subset of 179 patients from the group of 2,075 with pure respiratory viral infection that matched the 179 patients in the bacterial co-infection group with respect to four severity-related variables: gender, intensive care unit (ICU) admission status, mechanical ventilation, and in-hospital mortality. We used a matching algorithm to randomly select 75 discrete matched lists of 179 patients from the pure viral group. Receiver operator characteristic curves (ROCs) for PCT were plotted and areas under the curves (AUCs) were calculated for each matched list. The standard deviation of the AUCs for these 75 lists was low (0.019), and the 95% CI was 0.577 to 0.586. The list corresponding to the median AUC (0.584) was used as the matched viral group.

The number of matching variables (four) was constrained by the size of the study population. We selected gender, ICU admission, mechanical ventilation, and mortality for the primary analysis as these variables were significantly different between the pure viral and bacterial co-infection groups in Table 1, and represent important markers of disease severity *a priori*. However, several other variables in Table 1 were also significantly different between these two groups. We therefore performed sequential matching controls for every combination of these variables. This produced median AUCs that were nearly identical to the group used in the primary analysis (AUC 0.584). For example, matching for i) gender, ICU admission, fever, and obesity; and ii) gender, ICU admission, white blood cell count, and creatinine produced median AUCs of 0.582 and 0.579, respectively. It is important to note that certain matching variables were recorded contemporaneously with PCT (see 'Timing of patient data collection' below), while others were recorded at the terminal point of the hospitalization (e.g. mortality). Nevertheless, the timing of variable had no appreciable effect on the AUC results. For instance, matching against a combination of contemporaneous and terminal variables (such as gender, ICU admission, mechanical ventilation, and mortality – as used throughout the primary analysis) produced a highly similar AUC to a purely contemporaneous set of variables (such as gender, ICU admission, white blood cell count, and creatinine): 0.584 vs. 0.579, respectively.

We elected to utilize a matching strategy to control for the confounding effects of disease severity due to several factors that complicate more commonly-used adjustment analyses. For instance, the use of analysis of covariance (ANCOVA) proved difficult because of the high degree of collinearity between covariates, and the strong associations between group membership and nearly all of the covariates. Additional complexity arose from the presence of both dichotomous and continuous covariates, and from the large imbalance in sample size between groups. The matching strategy solved several of these problems, ensuring group size balance and simplifying subsequent analysis while maintaining statistical validity.

#### Timing of patient data collection

Patient laboratory tests and other clinical metrics (such as temperature and use of mechanical ventilation) were evaluated as close as possible to the time at which maximum PCT was measured. The median times between measurement of maximum PCT and evaluation of clinical metrics are recorded in the table below. All median times were below 12 hours, indicating that evaluation of clinical metrics was largely contemporaneous with the measurement of PCT.

| <b>Median time between procalcitonin measurement and evaluation of metric</b> |                        |
|-------------------------------------------------------------------------------|------------------------|
| <b>Metric</b>                                                                 | Median time (IQR)      |
| <b>Creatinine</b>                                                             | 3.4 hours (1.4, 5.0)   |
| <b>Lactate</b>                                                                | 6.0 hours (1.9, 18.9)  |
| <b>ALT</b>                                                                    | 6.7 hours (2.6, 18.1)  |
| <b>INR</b>                                                                    | 7.7 hours (2.9, 27.7)  |
| <b>WBC</b>                                                                    | 3.8 hours (1.7, 5.5)   |
| <b>Maximum temperature</b>                                                    | 11.8 hours (4.1, 31.7) |
| <b>Mechanical ventilation</b>                                                 | 1.9 hours (0.2, 28.5)  |

## Missing data

In assembling Tables 1 and 3, patients lacking select data points were omitted from analysis related to that characteristic. Data points were missing due to an inability to extract the data from the electronic medical record or because the data were not obtained (e.g. an unmeasured laboratory test). Multiple imputation was not deemed appropriate as Little's missing completely at random (MCAR) test rejected the MCAR assumption ( $P < 0.001$ ). However, the low percentages of missing values, as seen in the table below, suggest a minimal effect on the data.

| Table | Group                                           | Characteristic       | # of patients missing data for characteristic (% of total) |
|-------|-------------------------------------------------|----------------------|------------------------------------------------------------|
| 1     | Matched viral group                             | BMI                  | 3 (0.8%)                                                   |
| 1     | Matched viral group                             | WBC                  | 1 (0.3%)                                                   |
| 1     | Matched viral group                             | Creatinine           | 1 (0.3%)                                                   |
| 1     | Matched viral group                             | <b>Comorbidities</b> | <b>10 (2.8%)</b>                                           |
| 1     | Unmatched viral group                           | <b>BMI</b>           | <b>70 (3.1%)</b>                                           |
| 1     | Unmatched viral group                           | Temperature          | 1 (< 0.1%)                                                 |
| 1     | Unmatched viral group                           | WBC                  | 6 (0.3%)                                                   |
| 1     | Unmatched viral group                           | Creatinine           | 5 (0.2%)                                                   |
| 1     | Unmatched viral group                           | <b>Comorbidities</b> | <b>39 (1.7%)</b>                                           |
| 3     | Unmatched viral & bacterial co-infection groups | Temperature          | 1 (< 0.1%)                                                 |
| 3     | Unmatched viral & bacterial co-infection groups | Creatinine           | 3 (0.8%)                                                   |

Definition of immunocompromising comorbidities:

| ICD10 code    | Disease                                                                                 |
|---------------|-----------------------------------------------------------------------------------------|
| <b>B20-24</b> | Human immunodeficiency virus [HIV] disease                                              |
| <b>C81</b>    | Hodgkin lymphoma                                                                        |
| <b>C82</b>    | Follicular lymphoma                                                                     |
| <b>C83</b>    | Non-follicular lymphoma                                                                 |
| <b>C84</b>    | Mature T/NK-cell lymphomas                                                              |
| <b>C85</b>    | Other specified and unspecified types of non-Hodgkin lymphoma                           |
| <b>C86</b>    | Other specified types of T/NK-cell lymphoma                                             |
| <b>C88</b>    | Malignant immunoproliferative diseases and certain other B-cell lymphomas               |
| <b>C90</b>    | Multiple myeloma and malignant plasma cell neoplasms                                    |
| <b>C91</b>    | Lymphoid leukemia                                                                       |
| <b>C92</b>    | Myeloid leukemia                                                                        |
| <b>C93</b>    | Monocytic leukemia                                                                      |
| <b>C94</b>    | Other leukemias of specified cell type                                                  |
| <b>C95</b>    | Leukemia of unspecified cell type                                                       |
| <b>C96</b>    | Other and unspecified malignant neoplasms of lymphoid, hematopoietic and related tissue |
| <b>D46</b>    | Myelodysplastic syndromes                                                               |
| <b>D47</b>    | Other neoplasms of uncertain behavior of lymphoid, hematopoietic and related tissue     |
| <b>D48</b>    | Neoplasm of uncertain behavior of other and unspecified sites                           |
| <b>D61</b>    | Other aplastic anemias and other bone marrow failure syndromes                          |
| <b>D70</b>    | Neutropenia                                                                             |
| <b>D71</b>    | Functional disorders of polymorphonuclear neutrophils                                   |
| <b>D72</b>    | Other disorders of white blood cells                                                    |
| <b>D75.81</b> | Myelofibrosis                                                                           |
| <b>D80</b>    | Immunodeficiency with predominantly antibody defects                                    |
| <b>D81</b>    | Combined immunodeficiencies                                                             |
| <b>D82</b>    | Immunodeficiency associated with other major defects                                    |
| <b>D83</b>    | Common variable immunodeficiency                                                        |
| <b>D84</b>    | Other immunodeficiencies                                                                |
| <b>T86</b>    | Complications of transplanted organs and tissue                                         |
| <b>Z92.25</b> | Personal history of immunosuppression therapy                                           |

Sacrifice and bronchoalveolar lavage

Mice were euthanized via injection with 100 mg/kg and 10 mg/kg of ketamine and xylazine, respectively. The abdominal aorta was cannulated for arterial blood testing via the i-STAT 1 Handheld Analyzer (Abaxis, Union City, USA) and CG4+ cartridges as per the manufacturer's instructions. Due to occasional cartridge failure, certain samples were not accurately analyzed and were therefore excluded. The trachea was then exposed by making a small midline incision on the neck and cannulated with a 22g

catheter. Two sequential aliquots of 750  $\mu$ L cold PBS were instilled, retrieved, and pooled. Lungs were harvested, snap frozen in liquid nitrogen, and analyzed by qPCR as described below. White blood cell count in bronchoalveolar lavage (BAL) fluid was measured using a coulter counter (Beckman Coulter, Brea, USA). BAL was streaked out on sheep's blood agar plates (Thermo Fisher Scientific, Waltham, USA) to assess for bacterial growth after 48 hours. Cells in BAL were pelleted by centrifugation at 2,000 x g for 2 minutes and the protein content of the supernatant was measured using the Pierce BCA Protein Assay Kit (Thermo Fisher Scientific, Waltham, USA) following manufacturer's instructions. IFN- $\gamma$  enzyme-linked immunosorbent assay (ELISA) was performed with the DuoSet Mouse IFN-gamma ELISA DY485 (R&D systems, Minneapolis, USA).

#### Cultivation of A549 Cells

A549 cells CCL-185 (ATCC, Old Town Manassas, USA) were grown in DMEM supplemented with 1% penicillin/streptomycin, 1% L-Glutamine and 10% fetal bovine serum (all from Thermo Fisher Scientific, Waltham, USA). Cells were cultured in humidified atmosphere containing 5% CO<sub>2</sub> at 37°C. For infection, influenza A/PR8/34 (H1N1) was applied to cells at the indicated multiplicity of infection (MOI). After 24 or 48 hours (as indicated), cells were harvested, RNA was isolated, cDNA was synthesized, and qPCR was performed as described below.

## Quantitative PCR

RNA from lungs was isolated using the RNeasy Mini Kit (QIAGEN, Hilden, Germany).

cDNA was synthesized using the iScript cDNA Synthesis Kit #1708890 (BioRad,

Hercules, USA). qPCR was performed using the SsoAdvanced SYBR Green Supermix

#1725270 (BioRad, Hercules, USA). 18S ribosomal RNA was used as a housekeeping

gene. In some uninfected control samples, inflammatory gene expression was

undetectably low; these values were therefore excluded from analysis. Primer

sequences were as follows:

| Species | Gene          | Direction | Sequence (5' → 3')       |
|---------|---------------|-----------|--------------------------|
| Mouse   | 18S           | Forward   | GCAATTATTCCCCATGAACG     |
| Mouse   | 18S           | Reverse   | AGGGCCTCACTAAACCATCC     |
| Mouse   | Procalcitonin | Forward   | CCCTTTCCTGGTTGTCAGCATC   |
| Mouse   | Procalcitonin | Reverse   | AGCATGCAGGTA CT CAGATTCC |
| Mouse   | IL-6          | Forward   | CCGGAGAGGAGACTTCACAG     |
| Mouse   | IL-6          | Reverse   | CCGGAGAGGAGACTTCACAG     |
| Mouse   | IFN- $\gamma$ | Forward   | CACGGCACAGTCATTGAAAG     |
| Mouse   | IFN- $\gamma$ | Reverse   | GCTGATGGCCTGATTGTCTT     |
| Human   | 18S           | Forward   | GCAATTATTCCCCATGAACG     |
| Human   | 18S           | Reverse   | AGGGCCTCACTAAACCATCC     |
| Human   | Procalcitonin | Forward   | GGAGAGCAGCC CAGCAGACCC   |
| Human   | Procalcitonin | Reverse   | GTTGGCATTCTGGGGCATGCTAA  |
| Human   | IL-6          | Forward   | CCTTCAAAGATGGCTGAAA      |
| Human   | IL-6          | Reverse   | CAGGGGTGGTTATTGCATCT     |
| Human   | IFN- $\gamma$ | Forward   | CTAATTATTCGGTAACTGACTTGA |
| Human   | IFN- $\gamma$ | Reverse   | ACAGTTCAGCCATCACTTGGA    |

**Supplemental data:**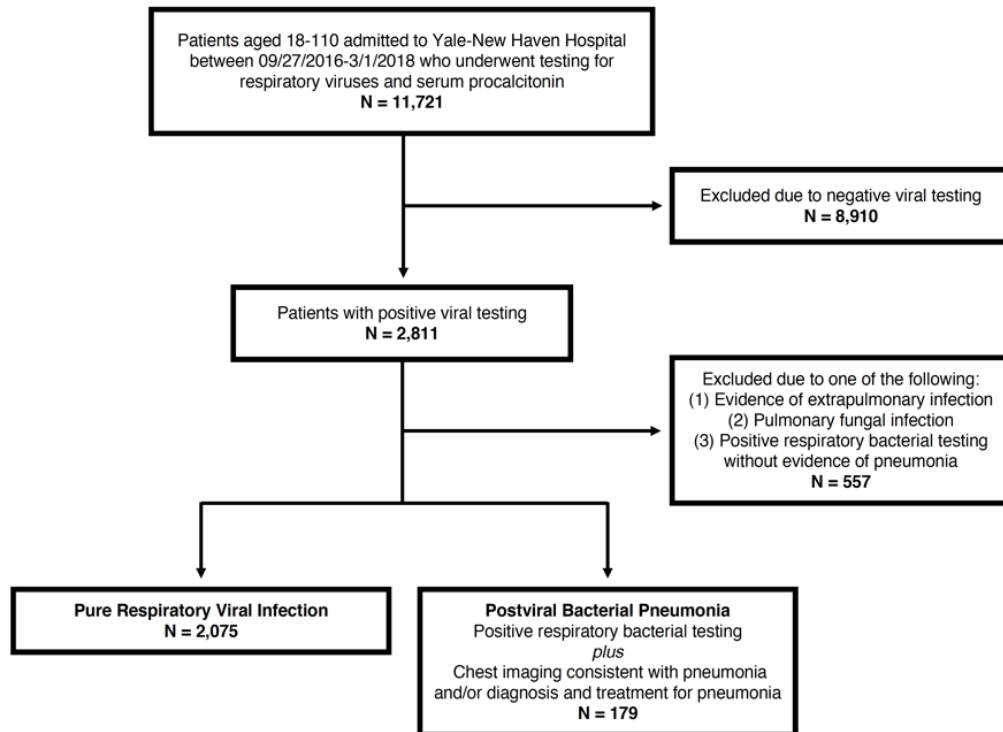**Figure E1. Flowchart depicting clinical study design.**



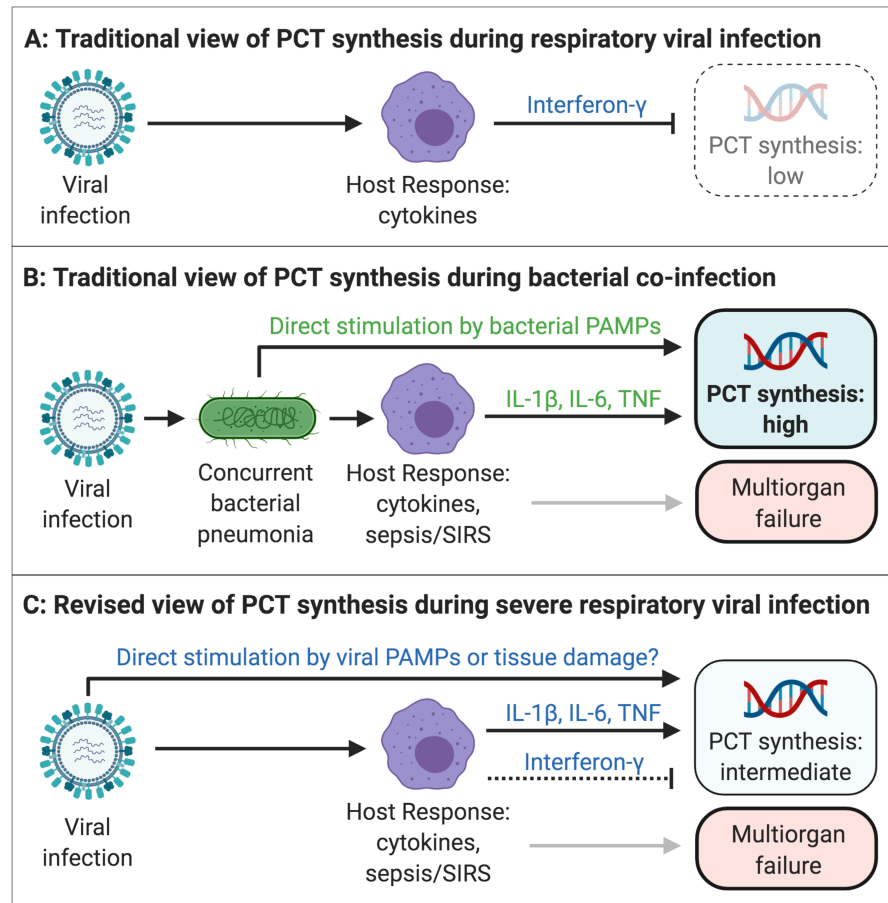

**Figure E2. Models of procalcitonin regulation during respiratory viral infection.** The conventional view holds that (A) viruses elicit IFN- $\gamma$ , resulting in suppression of PCT synthesis, and (B) elevated PCT indicates the presence of bacterial co-infection. Bacteria are known to stimulate PCT production via pathogen-associated molecular patterns (PAMPs) such as lipopolysaccharide and pro-inflammatory cytokines. C, In the present study we demonstrate that severe respiratory viral infection can elicit an intermediate level of PCT synthesis despite IFN- $\gamma$  signaling, indicating that interferons are not sufficient to suppress PCT (dotted line). The mechanisms by which viral infection stimulates PCT expression remain unknown.

**Table E1. Viral etiologies in patients with bacterial co-infection**

| <b>Virus</b>                | <b>Bacterial co-infection<br/>(n = 179)</b> |
|-----------------------------|---------------------------------------------|
| Influenza                   | 47 (26.1%)                                  |
| Rhinovirus                  | 69 (38.3%)                                  |
| Respiratory syncytial virus | 21 (11.7%)                                  |
| Human metapneumovirus       | 19 (10.6%)                                  |
| Parainfluenza               | 15 (8.3%)                                   |
| Adenovirus                  | 4 (2.2%)                                    |
| Cytomegalovirus             | 4 (2.2%)                                    |
| Herpes simplex virus        | 1 (0.6%)                                    |

**Table E2. Specificity of procalcitonin for clinical conditions at various thresholds**

| <b>Clinical condition</b>         | <b>Specificity (%) for condition at procalcitonin threshold of x</b> |             |             |             |             |             |
|-----------------------------------|----------------------------------------------------------------------|-------------|-------------|-------------|-------------|-------------|
|                                   | x=0.1                                                                | x=0.25      | x=0.5       | x=1         | x=2         | x=5         |
| <b>Bacterial co-infection</b>     | <b>43.7</b>                                                          | <b>71.7</b> | <b>81.6</b> | <b>87.9</b> | <b>93.5</b> | <b>97.1</b> |
| Renal insufficiency (Cr > 1.5)    | <b>49.3</b>                                                          | <b>77.8</b> | <b>86.4</b> | <b>91.1</b> | <b>95.1</b> | <b>97.5</b> |
| Death                             | 42.5                                                                 | 70.9        | 81.0        | 87.4        | 93.2        | 96.7        |
| Renal failure requiring dialysis  | 43.1                                                                 | <b>72.0</b> | <b>82.0</b> | <b>88.0</b> | 93.4        | 96.9        |
| Cardiovascular shock              | 43.2                                                                 | <b>71.8</b> | <b>82.2</b> | <b>88.6</b> | <b>94.0</b> | <b>97.3</b> |
| Respiratory failure requiring PPV | 43.3                                                                 | <b>71.9</b> | <b>82.0</b> | <b>88.2</b> | <b>94.0</b> | <b>97.3</b> |
| Fever (temperature > 37.9°C)      | <b>50.7</b>                                                          | <b>78.3</b> | <b>87.1</b> | <b>91.9</b> | <b>96.3</b> | <b>98.8</b> |
| ICU admission                     | <b>46.0</b>                                                          | <b>75.2</b> | <b>84.8</b> | <b>90.5</b> | <b>95.6</b> | <b>97.9</b> |

Bolded: Specificity values greater than that for bacterial co-infection.

Abbreviations: creatinine (Cr); intensive care unit (ICU); positive pressure ventilation (PPV).

**Table E3. Sensitivity of procalcitonin for clinical conditions at various thresholds**

| <b>Clinical condition</b>         | <b>Sensitivity (%) for condition at procalcitonin threshold of x</b> |             |             |             |             |             |
|-----------------------------------|----------------------------------------------------------------------|-------------|-------------|-------------|-------------|-------------|
|                                   | x=0.1                                                                | x=0.25      | x=0.5       | x=1         | x=2         | x=5         |
| <b>Bacterial co-infection</b>     | <b>81.0</b>                                                          | <b>52.5</b> | <b>35.2</b> | <b>24.0</b> | <b>14.5</b> | <b>7.8</b>  |
| Renal insufficiency (Cr > 1.5)    | <b>93.6</b>                                                          | <b>80.9</b> | <b>55.3</b> | <b>34.0</b> | <b>19.1</b> | 4.3         |
| Death                             | <b>91.4</b>                                                          | <b>65.0</b> | <b>46.4</b> | <b>31.0</b> | <b>16.9</b> | 6.9         |
| Renal failure requiring dialysis  | <b>86.2</b>                                                          | <b>73.3</b> | <b>54.1</b> | <b>33.9</b> | <b>16.5</b> | 6.4         |
| Cardiovascular shock              | <b>81.3</b>                                                          | <b>61.9</b> | <b>50.0</b> | <b>38.8</b> | <b>24.6</b> | <b>11.9</b> |
| Respiratory failure requiring PPV | <b>82.6</b>                                                          | <b>62.3</b> | <b>47.1</b> | <b>32.6</b> | <b>23.2</b> | <b>11.6</b> |
| Fever (temperature > 37.9°C)      | 70.3                                                                 | 41.7        | 28.9        | 19.7        | 11.7        | 6.0         |
| ICU admission                     | 74.1                                                                 | 49.9        | <b>36.2</b> | <b>26.1</b> | <b>17.0</b> | 7.7         |

Bolded: Sensitivity values greater than that for bacterial co-infection.

Abbreviations: creatinine (Cr); intensive care unit (ICU); positive pressure ventilation (PPV).

| <b>Table E4. Clinical history of patients with pure viral respiratory infection and procalcitonin &gt; 20 ng/ml</b> |                       |                |                          |                             |                                                                                                                                                                                                                                                                                                                                                                                                                                                                 |
|---------------------------------------------------------------------------------------------------------------------|-----------------------|----------------|--------------------------|-----------------------------|-----------------------------------------------------------------------------------------------------------------------------------------------------------------------------------------------------------------------------------------------------------------------------------------------------------------------------------------------------------------------------------------------------------------------------------------------------------------|
| <b>Age/gender</b>                                                                                                   | <b>Viral etiology</b> | <b>Max PCT</b> | <b>Organ Dysfunction</b> | <b>Pure viral infection</b> | <b>Reason(s) for exclusion of bacterial pneumonia or clinical vignette of patients deemed indeterminate for co-infection (bold)</b>                                                                                                                                                                                                                                                                                                                             |
| 60/M                                                                                                                | Human metapneumovirus | 234.1          | No                       | Yes                         | Final diagnosis of sialadenitis in a patient with acute myelogenous leukemia.                                                                                                                                                                                                                                                                                                                                                                                   |
| 90/F                                                                                                                | Rhinovirus            | 27.6           | Yes                      | Yes                         | Multiple negative lower respiratory cultures including bronchoscopy.                                                                                                                                                                                                                                                                                                                                                                                            |
| 42/M                                                                                                                | Rhinovirus            | 38.7           | Yes                      | Yes                         | Course consistent with diffuse alveolar hemorrhage due to rapid clearing of radiographic opacities in a patient with granulomatosis with polyangiitis.                                                                                                                                                                                                                                                                                                          |
| 62/M                                                                                                                | Rhinovirus            | 21.3           | Yes                      | Yes                         | Negative lower respiratory cultures and final diagnosis of viral pneumonia and pulmonary edema.                                                                                                                                                                                                                                                                                                                                                                 |
| 83/F                                                                                                                | Influenza             | 22.3           | Yes                      | Yes                         | Multiple negative respiratory cultures.                                                                                                                                                                                                                                                                                                                                                                                                                         |
| 65/M                                                                                                                | Influenza             | 23.0           | Yes                      | Yes                         | Final diagnosis of influenza and volume overload. Imaging more consistent with edema than infection.                                                                                                                                                                                                                                                                                                                                                            |
| 42/M                                                                                                                | Influenza             | 28.8           | Yes                      | Yes                         | Final diagnosis of sepsis due to influenza; antibiotics were withheld.                                                                                                                                                                                                                                                                                                                                                                                          |
| 23/F                                                                                                                | Influenza             | 20.5           | No                       | Yes                         | Final diagnosis of vaso-occlusive crisis in the setting of influenza; antibiotics were withheld.                                                                                                                                                                                                                                                                                                                                                                |
| 74/M                                                                                                                | Influenza             | 35.4           | Yes                      | Yes                         | Negative lower respiratory cultures.                                                                                                                                                                                                                                                                                                                                                                                                                            |
| 75/M                                                                                                                | Influenza             | 38.5           | No                       | Yes                         | Consolidation absent on imaging, negative lower respiratory culture, and final diagnosis of influenza.                                                                                                                                                                                                                                                                                                                                                          |
| 44/F                                                                                                                | Influenza             | 40.7           | Yes                      | Yes                         | Negative lower respiratory cultures and final diagnosis of influenza.                                                                                                                                                                                                                                                                                                                                                                                           |
| 68/M                                                                                                                | Influenza             | 20.6           | No                       | Yes                         | Consolidation absent on imaging and negative lower respiratory cultures.                                                                                                                                                                                                                                                                                                                                                                                        |
| 85/M                                                                                                                | Influenza             | 20.3           | Yes                      | Yes                         | Negative lower respiratory cultures and final diagnosis of influenza.                                                                                                                                                                                                                                                                                                                                                                                           |
| 92/M                                                                                                                | Influenza             | 144.3          | No                       | Yes                         | Consolidation absent on imaging, negative lower respiratory cultures, and final diagnosis of influenza.                                                                                                                                                                                                                                                                                                                                                         |
| 45/F                                                                                                                | Influenza             | 161.4          | No                       | Yes                         | Consolidation absent on imaging and final diagnosis of influenza.                                                                                                                                                                                                                                                                                                                                                                                               |
| 64/F                                                                                                                | Influenza             | 35.3           | Yes                      | Yes                         | Consolidation absent on imaging and final diagnosis of influenza.                                                                                                                                                                                                                                                                                                                                                                                               |
| 78/M                                                                                                                | Influenza             | 22.7           | Yes                      | Yes                         | Consolidation absent on imaging and final diagnosis of influenza.                                                                                                                                                                                                                                                                                                                                                                                               |
| 65/M                                                                                                                | <b>Influenza</b>      | <b>200.0</b>   | Yes                      | <b>Indeterminate</b>        | <b>Hazy multifocal opacities were present. Respiratory culture was not ordered. Antibiotics were given. Final diagnosis was COPD exacerbation due to influenza, but there was concern for possible superimposed bacterial pneumonia. Ultimately, the decision to treat with antibiotics was such was based on the extremely elevated PCT and the patient's immunosuppressed status (patient was taking prednisone and mycophenolate for kidney transplant).</b> |
| 90/F                                                                                                                | <b>Influenza</b>      | <b>75.8</b>    | Yes                      | <b>Indeterminate</b>        | <b>Chest X-ray showed a chronic retrocardiac opacity. Respiratory cultures were not ordered. Antibiotics were given. Discharge diagnosis included bacterial pneumonia, but the patient had no fever or respiratory symptoms.</b>                                                                                                                                                                                                                                |
| 87/F                                                                                                                | <b>Influenza</b>      | <b>192.9</b>   | Yes                      | <b>Indeterminate</b>        | <b>Bilateral opacities were considered to be consistent with pneumonia or edema. A respiratory culture was drawn, but rejected for poor quality. Antibiotics were given. Final diagnosis was influenza complicated by ARDS, stress cardiomyopathy, and pulmonary edema, but bacterial superinfection could not be ruled out.</b>                                                                                                                                |

Abbreviations: acute respiratory distress syndrome (ARDS); chronic obstructive pulmonary disease (COPD); procalcitonin (PCT)

| Experiment                                 | Figure | Description                 | Fold change (Influenza / PBS control) | Fold change (compared to day 0 value) | P value | Significance |
|--------------------------------------------|--------|-----------------------------|---------------------------------------|---------------------------------------|---------|--------------|
| <b>Murine Lethal Influenza (200 PFU)</b>   | 2B     | Weight Loss Day 1           | 0.99                                  |                                       | 0.8852  | ns           |
|                                            |        | Weight Loss Day 2           | 0.98                                  |                                       | 0.2657  | ns           |
|                                            |        | Weight Loss Day 3           | 0.85                                  |                                       | <0.0001 | ****         |
|                                            |        | Weight Loss Day 4           | 0.79                                  |                                       | <0.0001 | ****         |
|                                            |        | Weight Loss Day 5           | 0.75                                  |                                       | <0.0001 | ****         |
|                                            |        | Weight Loss Day 6           | 0.73                                  |                                       | <0.0001 | ****         |
|                                            |        | O2 Saturation               | 0.88                                  |                                       | <0.0001 | ****         |
|                                            | 2C     | Lactate                     | 4.59                                  |                                       | 0.0008  | ***          |
|                                            |        | Creatinine                  | 1.66                                  |                                       | 0.0015  | **           |
|                                            |        | BAL Protein                 | 16.34                                 |                                       | <0.0001 | ****         |
|                                            |        | BAL WBC                     | 10.13                                 |                                       | <0.0001 | ****         |
|                                            | 2D     | PCT/18S RNA                 | 2.64                                  |                                       | <0.0001 | ****         |
|                                            |        | IL-6/18S RNA                | 87.39                                 |                                       | 0.0283  | *            |
| IFNg/18S RNA                               |        | 100.00                      |                                       | 0.0448                                | *       |              |
| Plasma IFNg                                |        | 4.42                        |                                       | 0.0037                                | **      |              |
| <b>Murine Sublethal Influenza (10 PFU)</b> | 3B     | PCT/18S RNA Day 0 v Day 3   |                                       | 4.58                                  | 0.0005  | ***          |
|                                            |        | PCT/18S RNA Day 0 v Day 7   |                                       | 7.06                                  | <0.0001 | ****         |
|                                            |        | PCT/18S RNA Day 0 v Day 16  |                                       | 2.96                                  | 0.0564  | ns           |
|                                            | 3C     | IL-6/18S RNA Day 0 v Day 3  |                                       | 109.77                                | 0.003   | **           |
|                                            |        | IL-6/18S RNA Day 0 v Day 7  |                                       | 107.17                                | <0.0001 | ****         |
|                                            |        | IL-6/18S RNA Day 0 v Day 16 |                                       | 122.40                                | 0.007   | **           |
|                                            |        | IFNg/18S RNA Day 0 v Day 3  |                                       | 12.63                                 | 0.0005  | ***          |
|                                            |        | IFNg/18S RNA Day 0 v Day 7  |                                       | 168.07                                | <0.0001 | ****         |
| IFNg/18S RNA Day 0 v Day 16                |        | 80.61                       | 0.007                                 | **                                    |         |              |
| <b>In vitro (MOI 10)</b>                   | 4A     | PCT/18S RNA                 | 2.57                                  |                                       | 0.0094  | **           |
|                                            |        | IL-6/18S RNA                | 15.82                                 |                                       | 0.0014  | **           |
|                                            |        | IFNg/18S RNA                | 3.84                                  |                                       | 0.0019  | **           |

Abbreviations: interferon-gamma (IFNg); multiplicity of infection (MOI); non-significant (ns); plaque forming units (PFU); phosphate buffered saline (PBS); procalcitonin (PCT); ribonucleic acid (RNA).
